# Supplementary material for: Reduced Attentional Control in Older Adults Leads to Deficits in Flexible Prioritization of Visual Working Memory
Source: MDPI journal article supplement (doi:10.3390/brainsci10080542), 2020-08-11
Supplement: s1 [file s1]

Supplementary Material

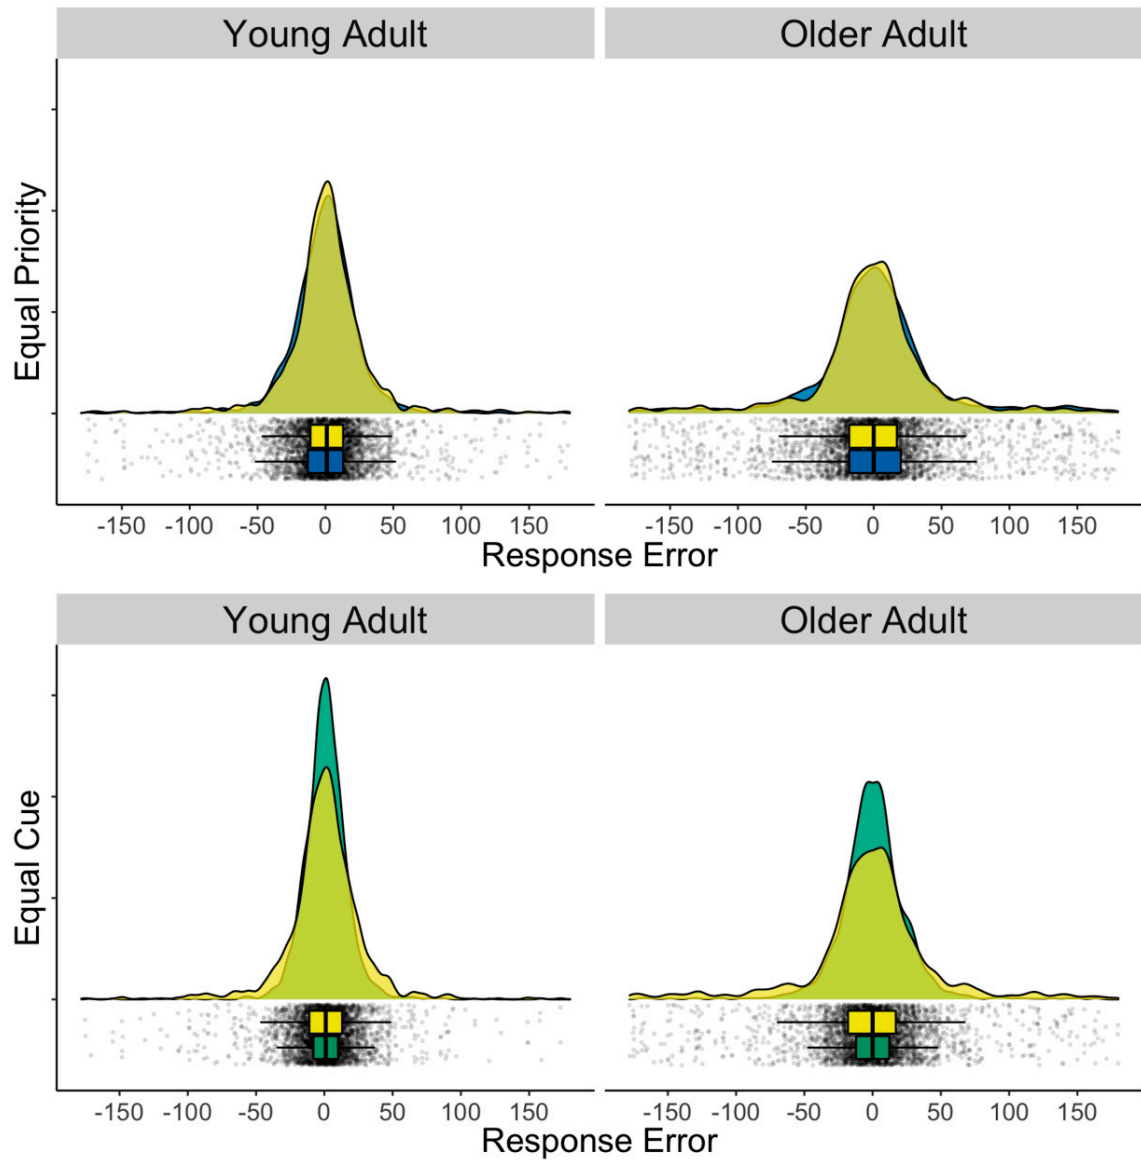

**Figure S1.** Top panel: Key comparison of error for conditions with equal priority (yellow = 1 cue – 50% valid; blue = 2 cues – 100% valid) reflecting similar performance at equal priority in young and older adults. Bottom panel: Key comparison of error for equal cue number (green = 1 cue – 100% valid; yellow = 1 cue – 50% valid) reflecting differentiation of cues based on priority when the number of cues was the same.

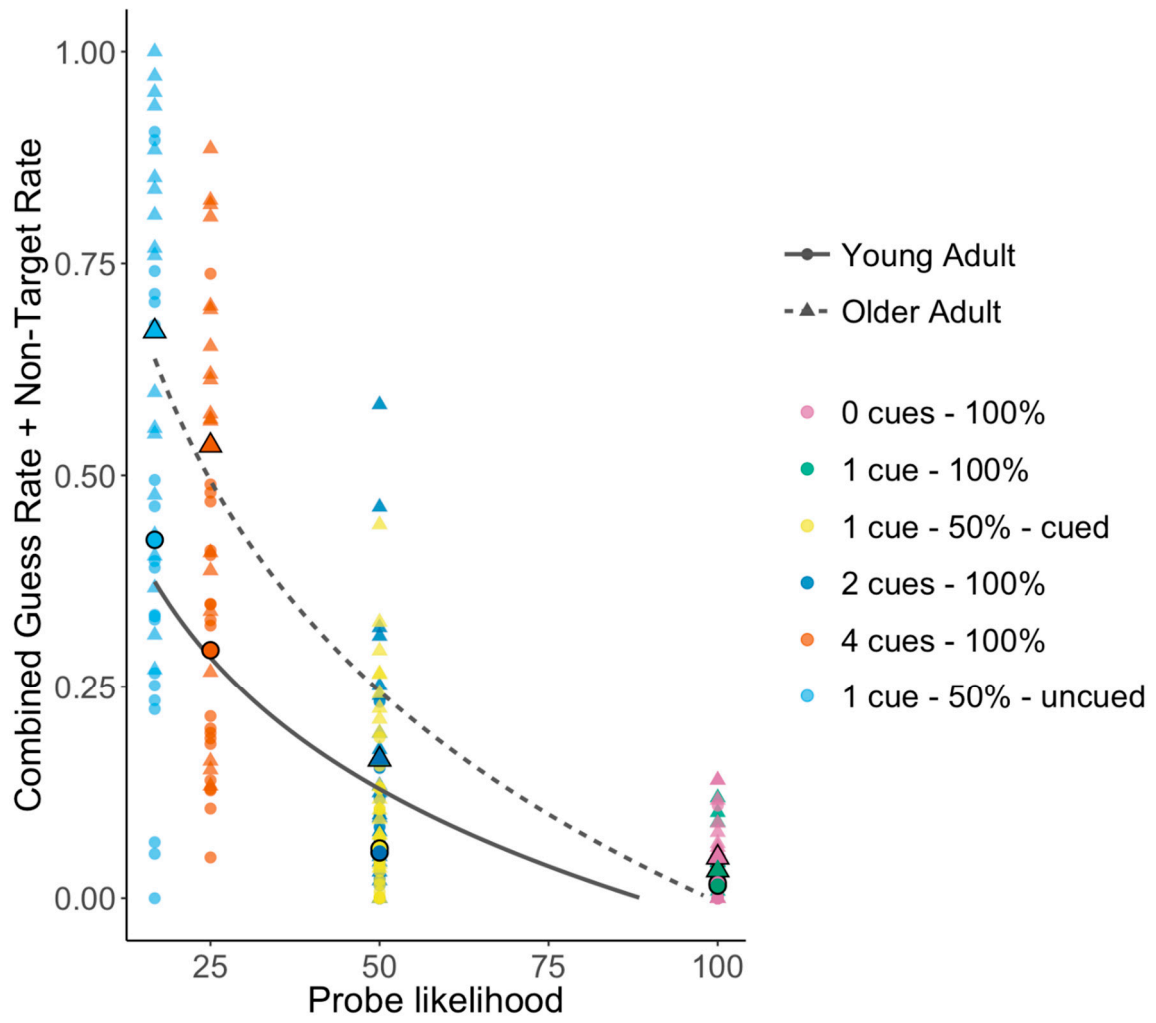

**Figure S2.** Combined error rate calculated by adding guess rate and non-target error rate for each age group and probe likelihood.

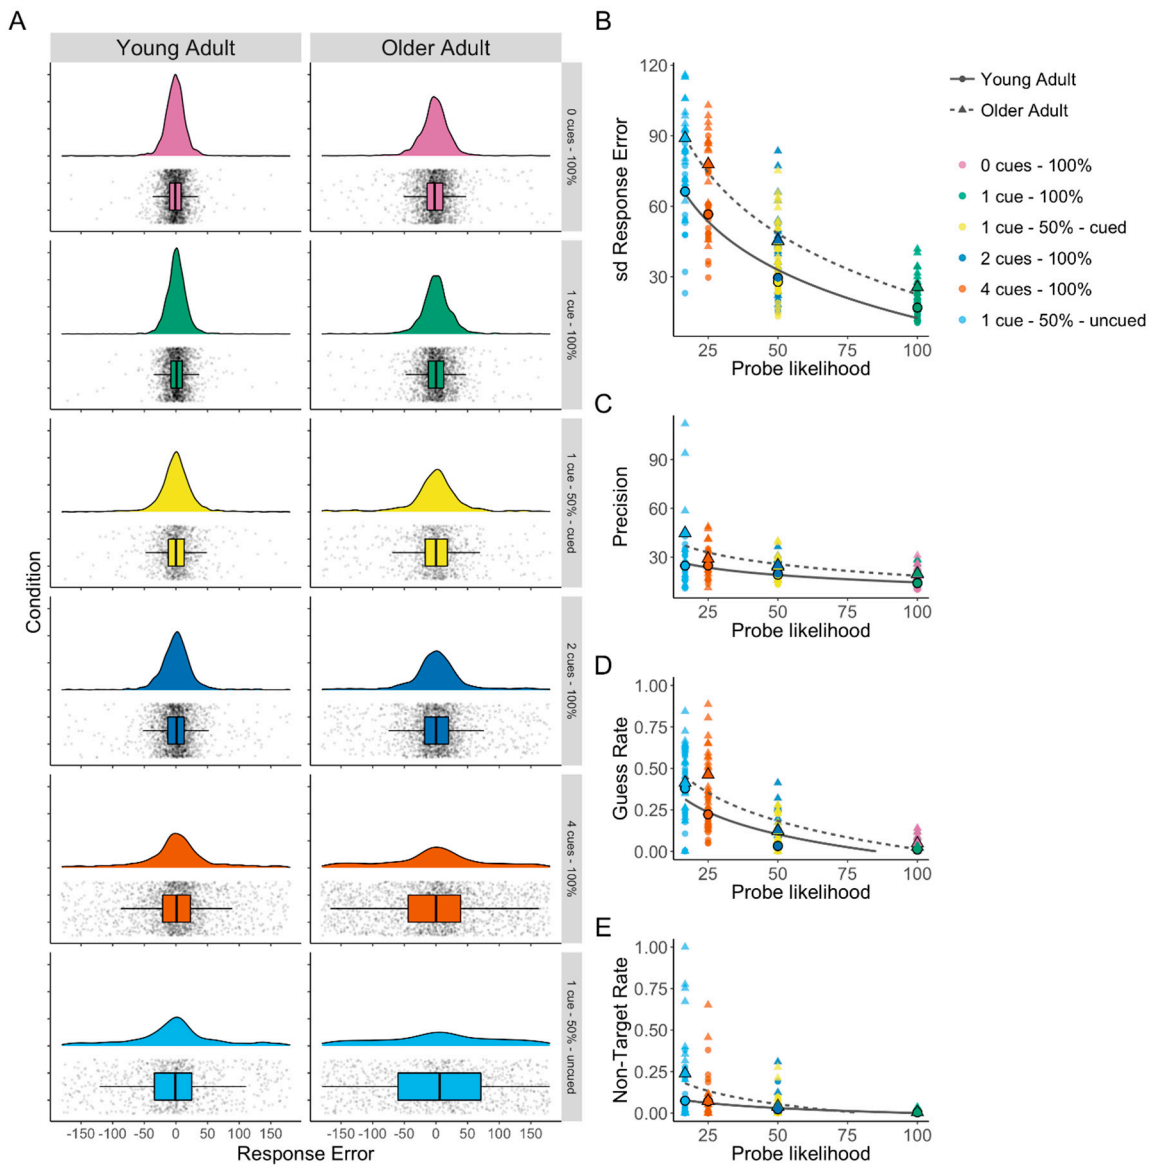

Figure S3. Results figure with uncorrected data.

**Table S1.** Summarizing the differences in results with uncorrected data.

| Model Parameter | Statistic               |                      | Corrected  | Uncorrected |
|-----------------|-------------------------|----------------------|------------|-------------|
| Precision       | Model BF:               | Without Interaction  | 1.432e +13 | 1.686e +9   |
|                 |                         | With Interaction     | 4.499e +11 | 6.032e +9   |
|                 |                         | Interaction BF incl. | 0.114      | 13.590      |
|                 | t-test BF <sub>10</sub> | 0 cues 100%          |            | 141.962     |
|                 |                         | 1 cue 100%           |            | 6069.968    |
|                 |                         | 2 cue 100%           |            | 71.140      |
|                 |                         | 1 cue 50% - cued     | 2.672      | 6.052       |
|                 |                         | 4 cues 100%          |            | 0.869       |
|                 | 1 cue 50% - uncued      | 0.469                | 2.845      |             |
| Guess Rate      | Model BF                | With Interaction     | 2.564e +39 | 6.988e +42  |
|                 |                         | Interaction BF incl. | 54.086     | 216.344     |
|                 | t-test BF <sub>10</sub> | 1 cue 50% - cued     | 5.917      | 25.299      |
|                 |                         | 1 cue 50% - uncued   | 0.388      | 0.338       |
| Non-target Rate | Model BF                | With Interaction     | 4.130e +5  | 6.092e +4   |
|                 |                         | Interaction BF incl. | 126.884    | 5.569       |
|                 |                         | Group BF incl.       | 43.664     | 2.115       |
|                 | t-test BF <sub>10</sub> | 1 cue 50% - cued     | 0.483      | 0.388       |
|                 |                         | 1 cue 50% - uncued   | 4.034      | 1.803       |
